# Supplementary material for: Multidisciplinary Collaboration for the Optimization of Antibiotic Prescription: Analysis of Clinical Cases of Pneumonia between Emergency, Internal Medicine, and Pharmacy Services
Source: MDPI journal article supplement (doi:10.3390/antibiotics11101336), 2022-09-30
Supplement: s1 [file s1]

Figure S1. Antibiotic consumption: DDD/1000 visits in emergency department in 2019-2020

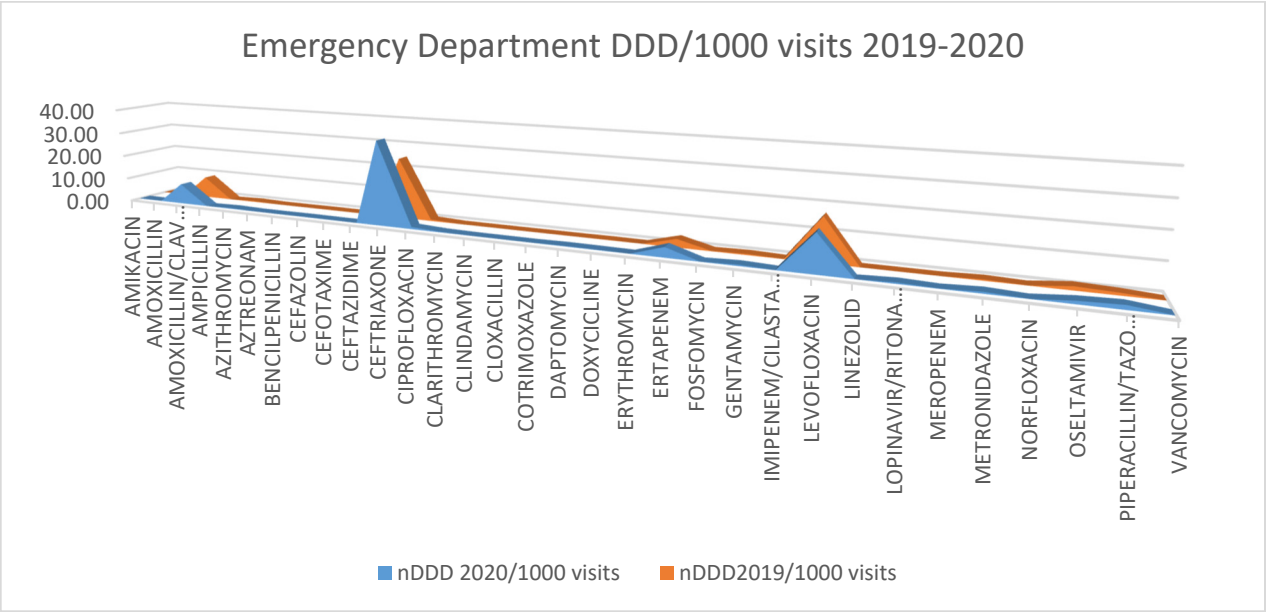

Figure S2. Antibiotic consumption: DDD/100 beds in internal medicine in 2019-2020

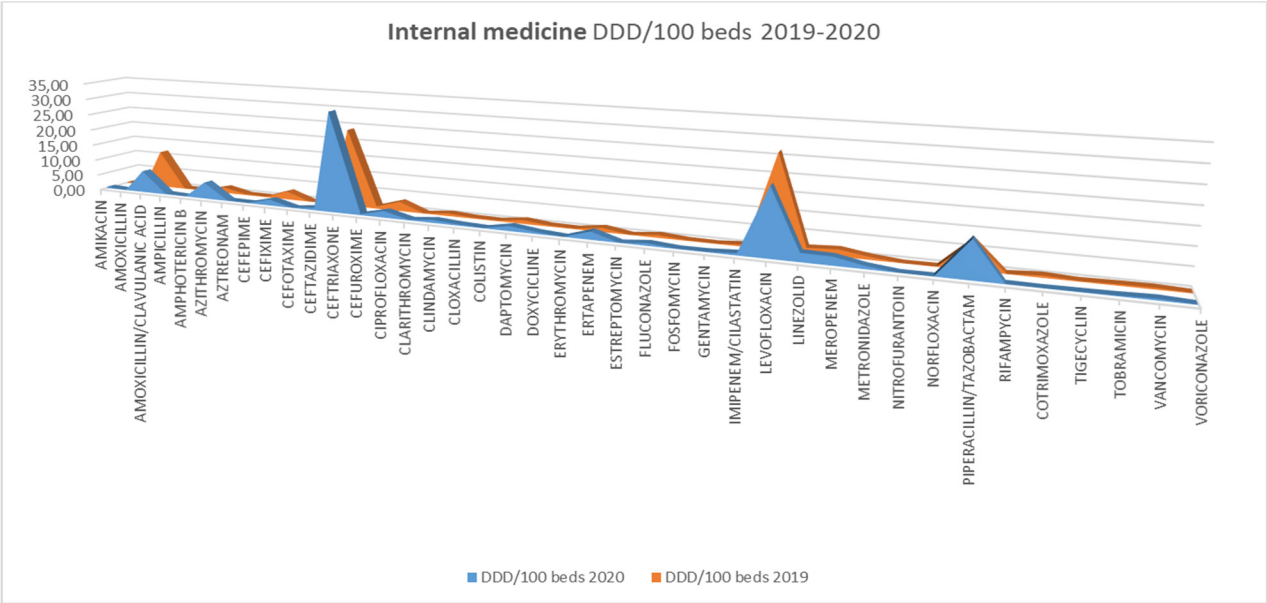

Figure S3. Antibiotic consumption: DDD/100 admissions in internal medicine in 2019-2020

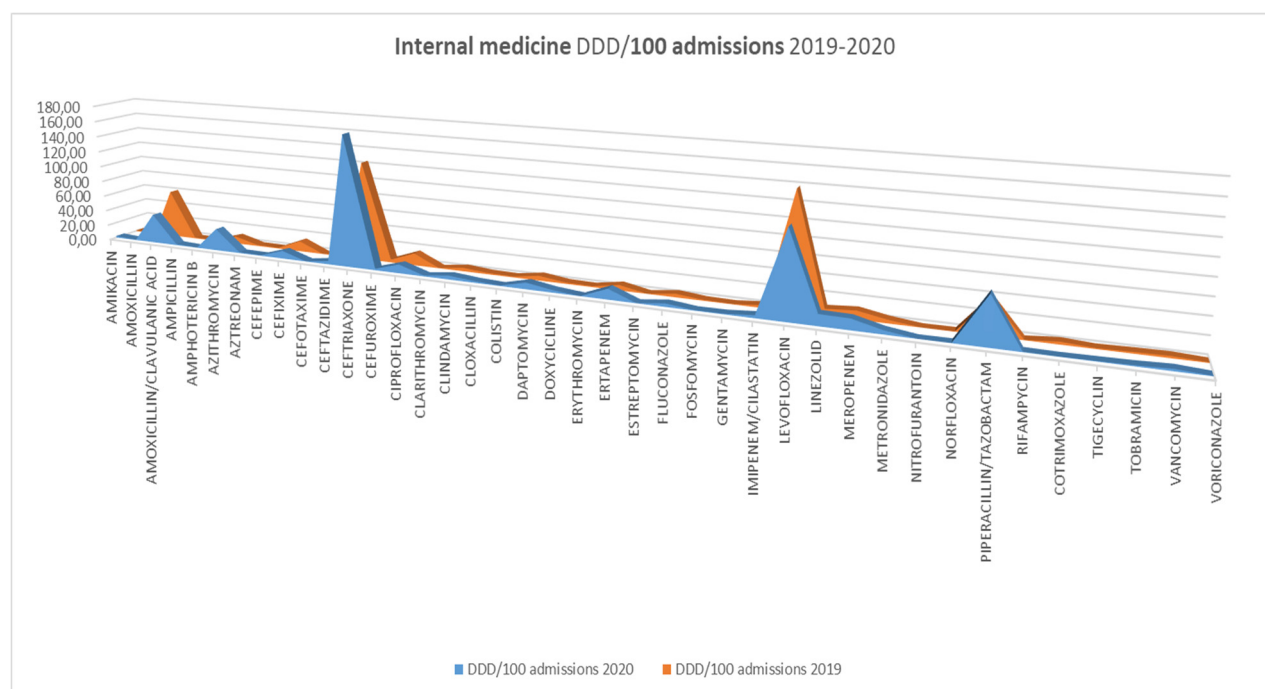

Table S1. Distribution of treatment duration

| Treatment duration | Number of patients | Mean  | Standard deviation | Confidence interval |
|--------------------|--------------------|-------|--------------------|---------------------|
| Optimal            | 25                 | 10.32 | 2.98               | (9.09 - 11.55)      |
| Excessive          | 25                 | 13.52 | 2.95               | (12.30 - 14.74)     |
| Short              | 0                  | (NA)  | NA                 | (NA – NA)           |
| Doubtful           | 5                  | 18.60 | 10.45              | (5.62 - 31.58)      |

NA: not applied
